## Practice Point

# Approaches to detecting tuberculosis in children and youth

Nicole Le Saux

Canadian Paediatric Society, Infectious Diseases and Immunization Committee, Ottawa, Ontario

**Correspondence:** Canadian Paediatric Society, 100–2305 St Laurent Blvd, Ottawa, Ontario K1G 4J8. E-mail [info@cps.ca](mailto:info@cps.ca), website [www.cps.ca](http://www.cps.ca)

For the full text document, visit [www.cps.ca/en/documents](http://www.cps.ca/en/documents)

This practice point provides a framework for initiating investigation in children suspected of having infection with *Mycobacterium tuberculosis* (Mtb). Some areas in Canada have a high burden of tubercular disease, with Indigenous populations being most at risk. Tuberculosis (TB) can present either as an acute or subacute illness and both primary or reactivation infection can cause pulmonary or multisystem disease. Tuberculin skin tests and interferon- $\gamma$  release assays can be used to support a suspected diagnosis. TB elimination in Canada is possible but requires improving social determinants of health, one of the major factors contributing to the spread of TB in populations at risk.

**Keywords:** *Bacille-Calmette-Guérin; Break of contact; Latent tuberculosis infection; Mycobacterium tuberculosis; Tuberculosis*

### CANADIAN PAEDIATRIC SOCIETY INFECTIOUS DISEASES AND IMMUNIZATION COMMITTEE

**Members:** Michelle Barton-Forbes MD; Sean Bitnun MD; Natalie A. Bridger MD; Shalini Desai MD (past member); Michael Forrester MD (Resident member); Ruth Grimes MD (Board Representative); Nicole Le Saux MD (Chair); Otto G. Vanderkooi MD

**Liaisons:** Upton D. Allen MBBS, Canadian Pediatric & Perinatal HIV/AIDS Research Group; Tobey Audcent MD, Committee to Advise on Tropical Medicine and Travel (CATMAT), Public Health Agency of Canada; Carrie Byington MD, Committee on Infectious Diseases, American Academy of Pediatrics; Fahamia Koudra MD, College of Family Physicians of Canada; Marc Lebel MD, IMPACT (Immunization Monitoring Program, ACTIVE); Jane McDonald MD, Association of Medical Microbiology and Infectious Disease Canada; Dorothy L. Moore MD, National Advisory Committee on Immunization (NACI); Howard Njoo MD, Public Health Agency of Canada

**Consultant:** Noni E. MacDonald MD

**Principal author:** Nicole Le Saux MD
